# Supplementary material for: Conductive cobalt doped niobium nitride porous spheres as an efficient polysulfide convertor for advanced lithium-sulfur batteries
Source: Royal Society of Chemistry journal article supplement (doi:10.1039/d0ta00800a), 2020-01-01
Supplement: d0ta00800a1.pdf [file d0ta00800a1.pdf]

Conductive Cobalt doped Niobium Nitride Porous Spheres as Efficient Polysulfide Converter  
for Advanced Lithium-Sulfur Batteries

*Weini Ge,<sup>a</sup> Lu Wang,<sup>a</sup> Chuanchuan Li,<sup>a</sup> Chunsheng Wang,<sup>a</sup> Debao Wang,<sup>b</sup> Yitai Qian  
<sup>a</sup> and Liqiang Xu<sup>\*a, c</sup>*

<sup>a</sup> Key Laboratory of Colloid & Interface Chemistry (Shandong University), Ministry of Education and School of Chemistry and Chemical Engineering, Shandong University, Jinan 250100, P. R. China

<sup>b</sup> College of Chemistry and Molecular Engineering, Qingdao University of Science and Technology, Qingdao 266042, P. R. China

<sup>c</sup> Key Laboratory of Advanced Energy Materials Chemistry (Ministry of Education), Nankai University, Tianjin 300071, P. R. China

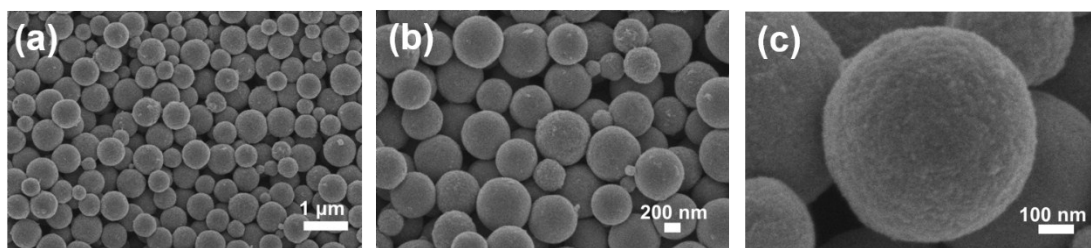

**Fig. S1** FESEM images of the precursor of Co-NbN.

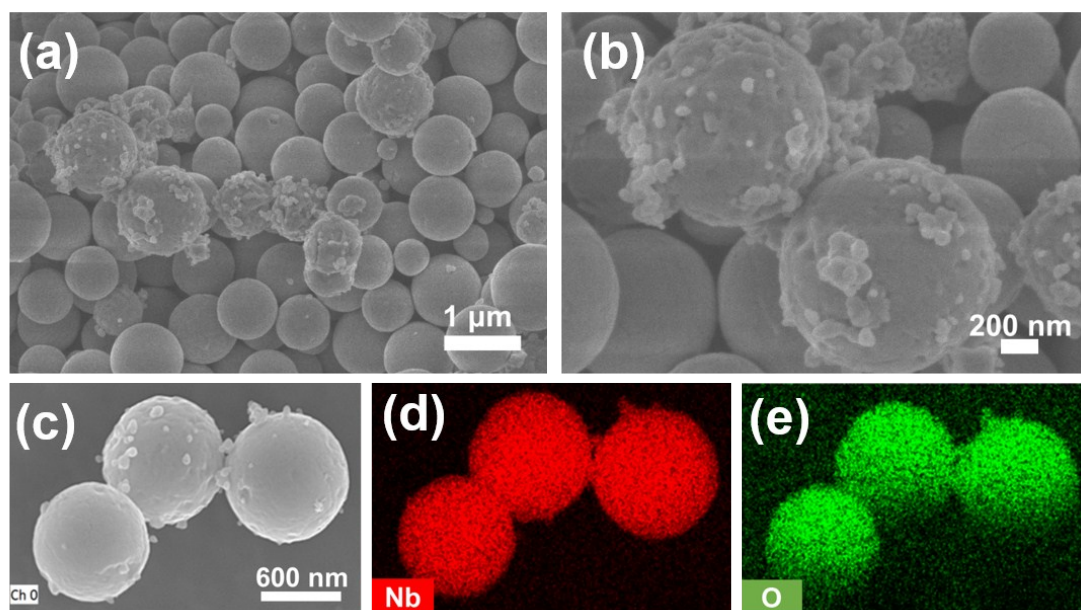

**Fig. S2** (a, b) FESEM images of Nb<sub>2</sub>O<sub>5</sub>. (c-e) SEM images and the corresponding EDS elemental mapping.

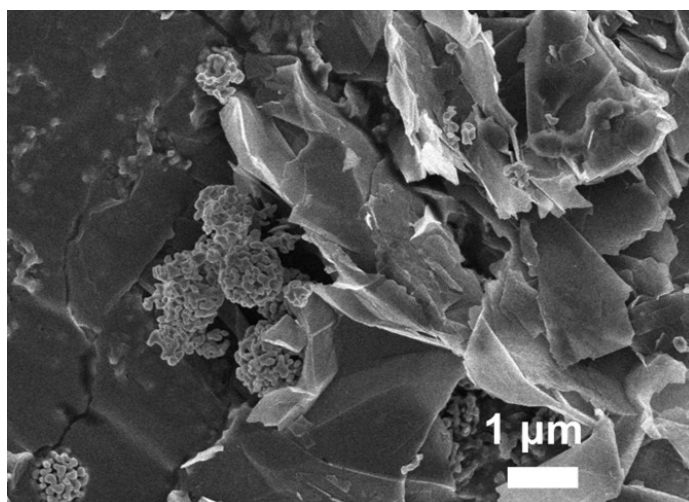

Fig. S3 The FESEM image of the obtained Co-NbN/rGO/S composite.

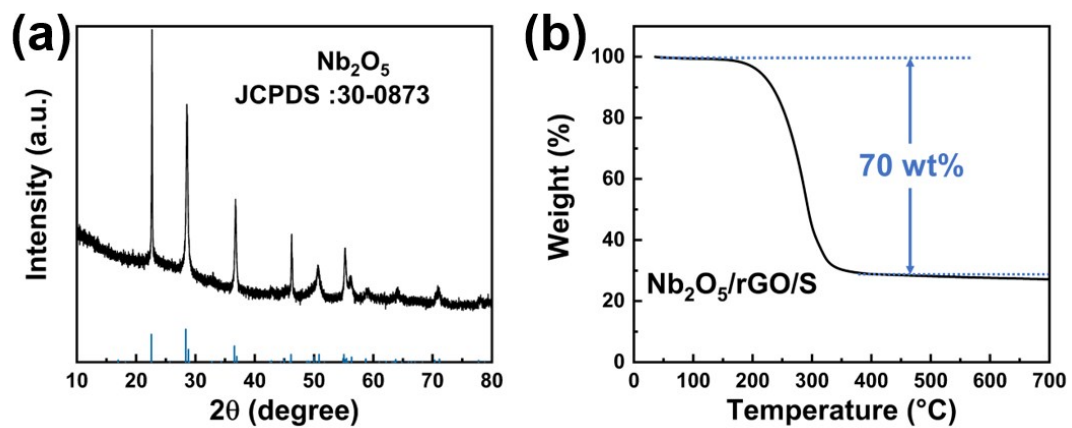

**Fig. S4** (a) XRD pattern of  $\text{Nb}_2\text{O}_5$ . (b) TGA curve of  $\text{Nb}_2\text{O}_5/\text{rGO}/\text{S}$ .

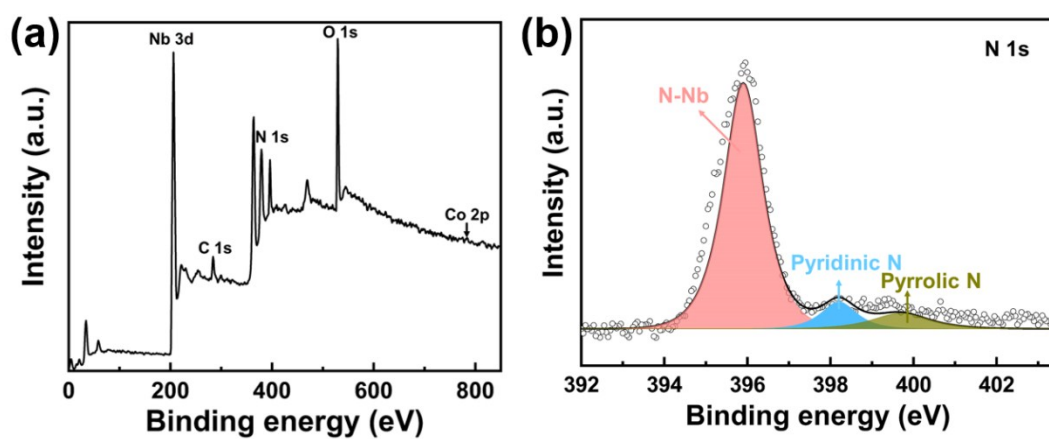

Fig. S5 (a) XPS survey spectrum of Co-NbN. (b) XPS fine N 1s spectrum of Co-NbN.

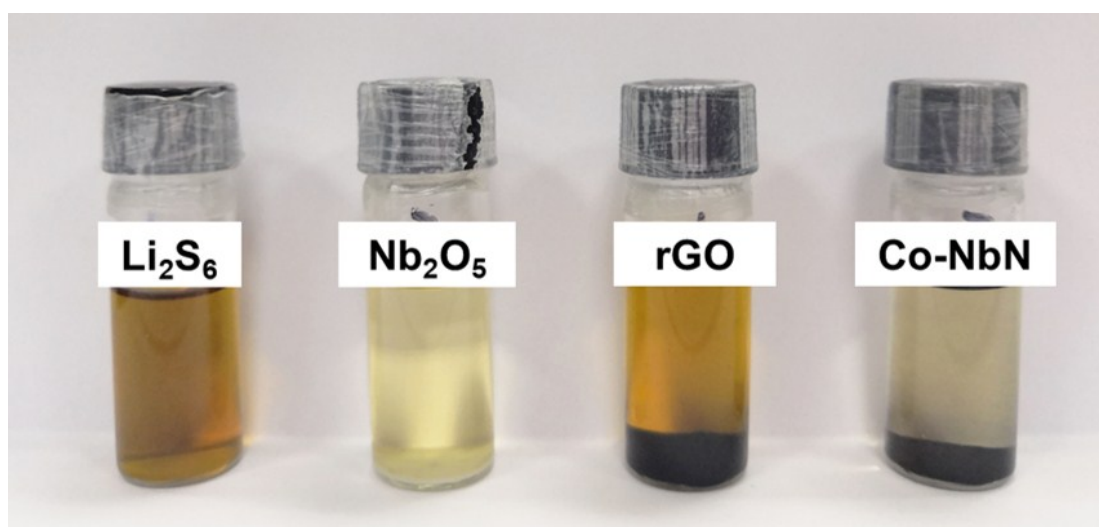

**Fig. S6** A digital photograph of polysulfides adsorption test after adding  $\text{Nb}_2\text{O}_5$ , rGO and Co-NbN sample.

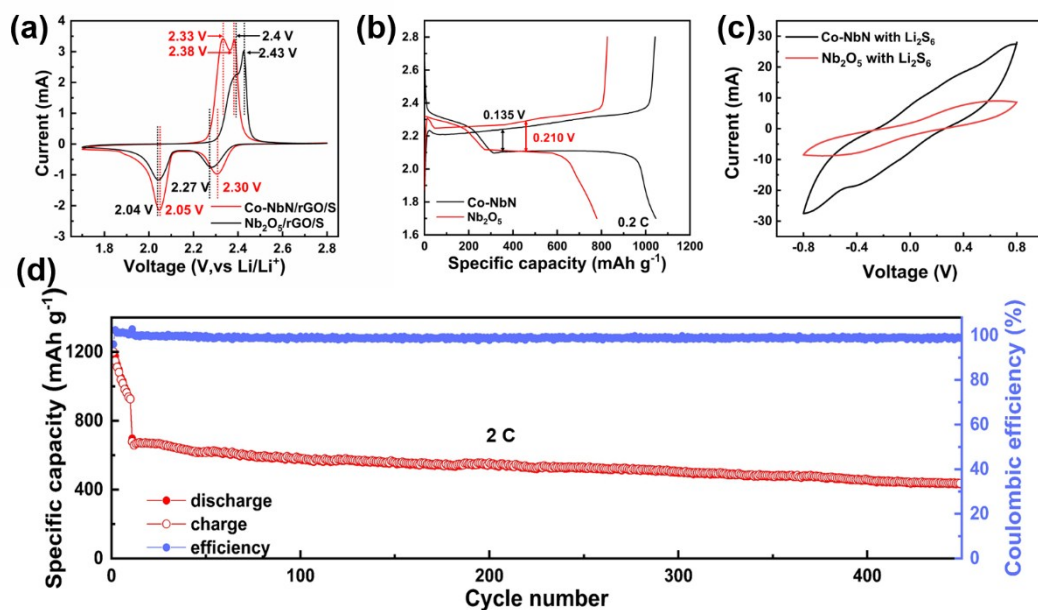

**Fig. S7** (a) Cyclic voltammograms curves of Co-NbN/rGO/S and Nb<sub>2</sub>O<sub>5</sub>/rGO/S cathodes at the scan rate of 0.1 mV s<sup>-1</sup>. (b) The typical galvanostatic charge-discharge voltage profiles of Co-NbN and Nb<sub>2</sub>O<sub>5</sub> based cathodes at 0.2 C. (c) CV curves of symmetric batteries with Co-NbN and Nb<sub>2</sub>O<sub>5</sub>. (d) Long-term cycle performance of Co-NbN/rGO/S cathode at 2 C.



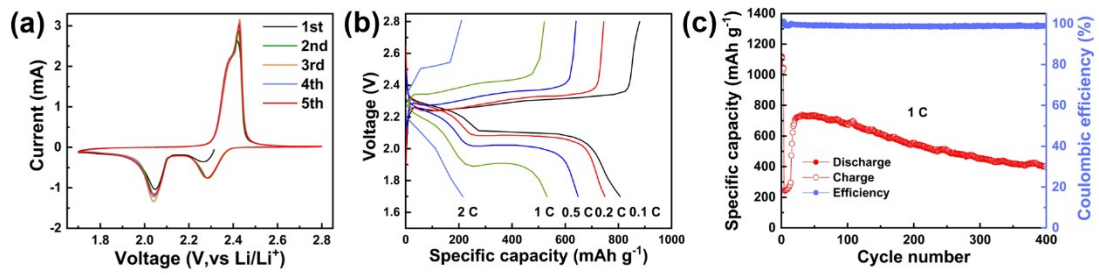

**Fig. S8** The electrochemical performance of Nb<sub>2</sub>O<sub>5</sub>/rGO/S cathode. (a) CV curves at a scan rate of 0.1 mV s<sup>-1</sup>. (b) The charge-discharge profiles at different current densities. (c) Long-term cycle performance at 1 C.

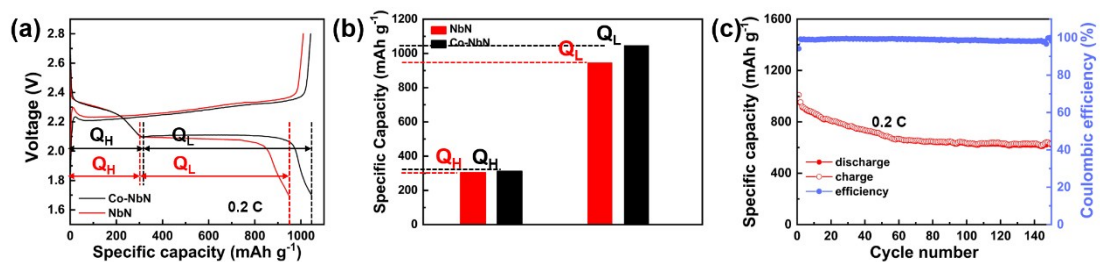

**Fig. S9** (a) The CV curves of Li-S batteries with Co-NbN and NbN at 0.2 C ( $Q_H$  and  $Q_L$  represent the high and low discharge plateaus capacities, respectively). (b) The discharge capacities of Co-NbN/rGO/S and NbN/rGO/S cathode. (c) Long-term cycle performance of NbN/rGO/S cathode at 0.2 C.

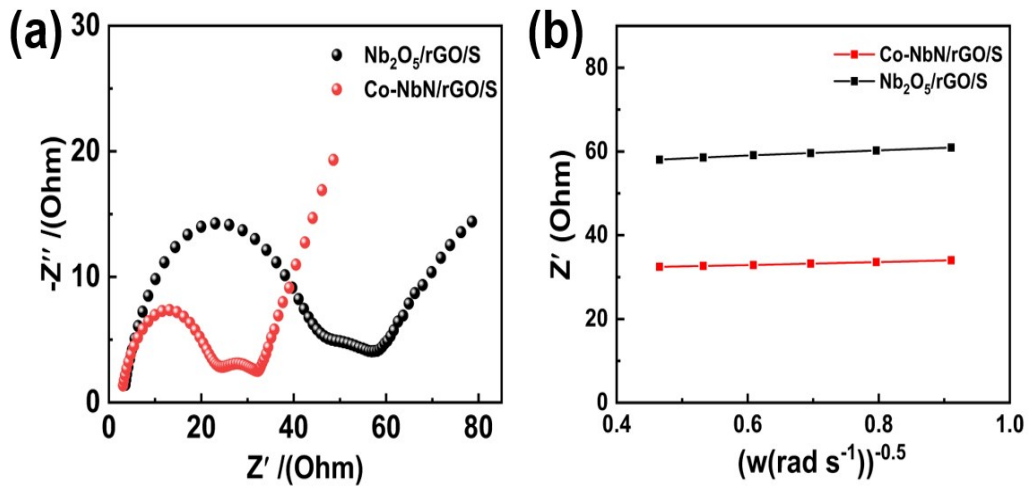

**Fig. S10** (a) The electrochemical impedance spectra (EIS) of Co-NbN/rGO/S and Nb<sub>2</sub>O<sub>5</sub>/rGO/S cathode. (b) The relationship between the  $Z'$  square root of angular frequency ( $\omega^{-1/2}$ ).

To further elucidate excellent conductivity and electrochemical performance of cobalt doped NbN, electrochemical impedance spectra (EIS) was measured. The Warburg coefficient and Li<sup>+</sup> diffusion ability was calculated via following equations (1-2):

$$Z_{re} = R_e + R_{ct} + \sigma \omega^{-0.5} \quad (1)$$

$$D_{Li^+} = 0.5(RT/AF^2C\sigma)^2 \quad (2)$$

Where R represents the gas constant,  $\omega$  represents angular frequency, T represents the absolute temperature, A represents the electrode surface area, F represents the Faraday constant, C represents volume molar concentration of lithium ion and n is the charge transfer number.

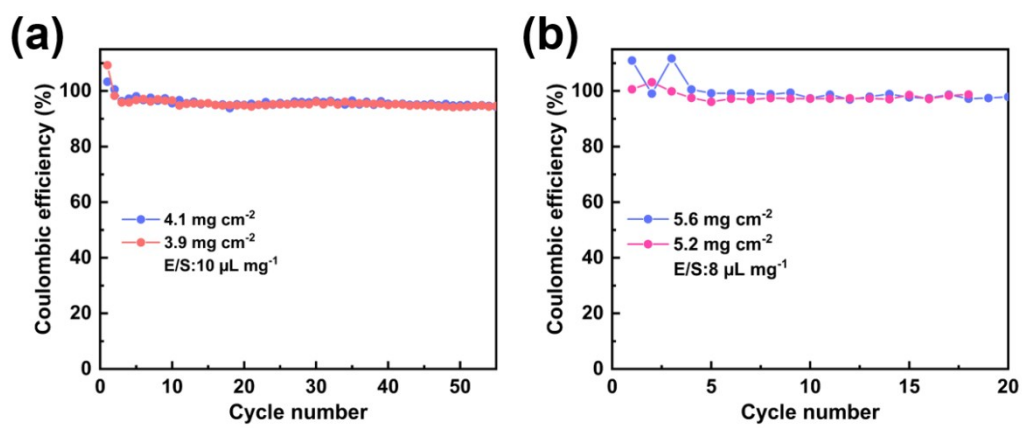

**Fig. S11** Coulombic efficiency of Co-NbN/rGO/S cathode at different areal sulfur loading and the content of electrolyte.

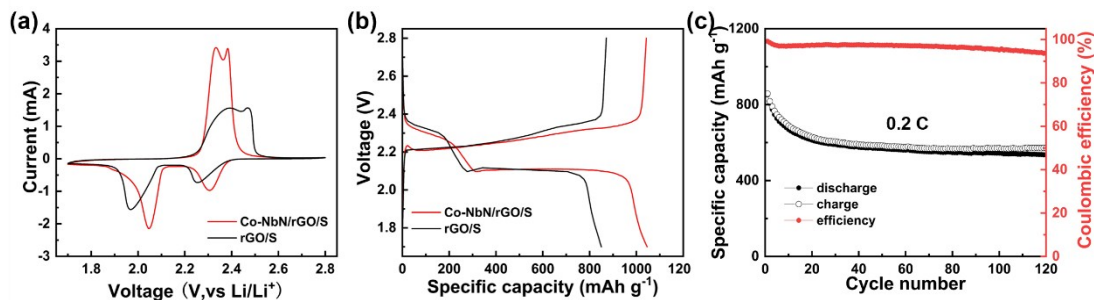

**Fig. S12** Co-NbN/rGO/S and rGO/S cathodes (a) Cyclic voltammograms curves at the scan rate of 0.1 mV s<sup>-1</sup> (b) Galvanostatic charge-discharge profiles at 0.2 C. (c) Cycle performance of rGO/S cathode at 0.2 C.

As shown in Fig. S12a, the CV curves of Co-NbN/rGO/S and rGO/S cathodes display that Co-NbN based cathode possesses two pairs of obvious redox peaks and lower oxidation potentials and higher reduction potentials, indicating that the electrochemical reversibility and polarization of Co-NbN based cathode are better than that of rGO based cathode. The typical galvanostatic charge-discharge profiles of Co-NbN/rGO/S and rGO/S are shown in Fig. S12b. The voltage gap of Co-NbN based cathode is smaller than that of rGO based cathode in charge-discharge profiles, which further suggests that Co-NbN can effectively reduce polarization of cathode. Co-NbN cathode has prolonged voltage plateaus, indicating that the rGO with weak physical adsorption ability is incapable of facilitating conversion of polysulfides. Fig. S12c exhibits the electrochemical performance of rGO/S cathode at 0.2 C. The rGO/S cathode displays rapid capacity fade and low coulombic efficiency, which indicates that rGO is incapable of efficiently inhibiting the shuttle effect and promoting the utilization of the sulfur.

**Table S1.** Comparison of the electrochemical performance of the porous cobalt doped NbN spheres and other similar materials reported in lithium-sulfur batteries. (1 C = 1675 mA g<sup>-1</sup>).

| Materials                                 | Sulfur Content (%) | Areal mass of cathode (mg cm <sup>-2</sup> ) | Current rate           | Cycle number | Electrochemical performance (mAh g <sup>-1</sup> ) | Reference |
|-------------------------------------------|--------------------|----------------------------------------------|------------------------|--------------|----------------------------------------------------|-----------|
| TiN                                       | 58.8               | 1.0                                          | 0.5 C                  | 500          | 644                                                | [1]       |
| MoN-VN                                    | 58.5               | 1.13                                         | 1 C                    | 500          | 555                                                | [2]       |
| TiN                                       | 70                 | 1.3                                          | 1 C                    | 400          | 560                                                | [3]       |
| C@TiN                                     | 71                 | 1.1                                          | 1 C                    | 150          | 741                                                | [4]       |
| WN                                        | 59                 | 0.92                                         | 2 C                    | 500          | 358                                                | [5]       |
| VN                                        | 70                 | 1.6                                          | 1 C                    | 800          | 368.6                                              | [6]       |
| Co/N-PC Ns                                | 68                 | 0.8-1.0                                      | 1 C                    | 200          | 633                                                | [7]       |
| g-C <sub>3</sub> N <sub>4</sub> /graphene | 65                 | 1.1                                          | 100 mA g <sup>-1</sup> | 600          | 505                                                | [8]       |
| TiN                                       | 70                 | 1.4-1.7                                      | 1 C                    | 300          | 505.2                                              | [9]       |
| NbN                                       |                    | 1.3                                          | 0.2 C                  | 200          | 554.6                                              | [10]      |
| Cobalt doped NbN                          | 72                 | 1.2-1.7                                      | 1 C                    | 800          | 404.5                                              | This work |
|                                           |                    |                                              | 2 C                    | 450          | 431                                                |           |
|                                           |                    |                                              | 0.2 C                  | 150          | 706.5                                              |           |

### Reference

1. Z. Cui, C. Zu, W. Zhou, A. Manthiram and J. B. Goodenough, *Adv Mater*, 2016, **28**, 6926-6931.
2. C. Ye, Y. Jiao, H. Jin, A. D. Slattery, K. Davey, H. Wang and S. Z. Qiao, *Angew. Chem. Int. Ed.*, 2018, **57**, 16703-16707.
3. B. Qi, X. Zhao, S. Wang, K. Chen, Y. Wei, G. Chen, Y. Gao, D. Zhang, Z. Sun and F. Li, *J. Mater. Chem. A*, 2018, **6**, 14359-14366.
4. Y. Wang, R. Zhang, Y.-c. Pang, X. Chen, J. Lang, J. Xu, C. Xiao, H. Li, K. Xi and S. Ding, *Energy Storage Materials*, 2019, **16**, 228-235.
5. Z. D. Huang, Y. Fang, M. Yang, J. Yang, Y. Wang, Z. Wu, Q. Du, T. Masese, R. Liu, X. Yang, C. Qian, S. Jin and Y. Ma, *ACS Appl Mater Interfaces*, 2019, **11**, 20013-20021.
6. Y. Song, S. Zhao, Y. Chen, J. Cai, J. Li, Q. Yang, J. Sun and Z. Liu, *ACS Appl Mater Interfaces*, 2019, **11**, 5687-5694.
7. S. Liu, J. Li, X. Yan, Q. Su, Y. Lu, J. Qiu, Z. Wang, X. Lin, J. Huang, R. Liu, B. Zheng, L. Chen, R. Fu and D. Wu, *Adv Mater*, 2018, **30**, e1706895.
8. M. Wang, Q. Liang, J. Han, Y. Tao, D. Liu, C. Zhang, W. Lv and Q.-H. Yang, *Nano Res.*, 2018, **11**, 3480-3489.
9. C. Li, J. Shi, L. Zhu, Y. Zhao, J. Lu and L. Xu, *Nano Res.*, 2018, **11**, 4302-4312.
10. W. Qiu, C. An, Y. Yan, J. Xu, Z. Zhang, W. Guo, Z. Wang, Z. Zheng, Z. Wang, Q. Deng and J. Li, *J. Power Sources*, 2019, **423**, 98-105.
